# Supplementary material
Source: publisher figshare collection journal article supplement (https://acs.figshare.com/ndownloader/files/30847439)
Supplement: Supplementary file 1 [file 30847439]

## Supporting Information

# Facile “Lotus Blooming” Strategy to Synthesize 3D Carbon Nanosheet/Carbon Nanotube Framework Embedded with Co Nanocrystals for High-Performance Lithium-Sulfur Batteries

*Tianning Lin,<sup>†,#</sup> Hongfeng Jia,<sup>†,#</sup> Usman Ali,<sup>†,#</sup> Bingqiu Liu,<sup>†</sup> Qi Zhang,<sup>†</sup> Zhanshuang*

*Jin,<sup>\*,‡</sup> Lu Li,<sup>\*,†</sup> Lingyu Zhang,<sup>†</sup> and Chungang Wang<sup>\*,†</sup>*

<sup>†</sup>Department of Chemistry, Northeast Normal University, 5268 Renmin Street,  
Changchun, Jilin, 130024, P. R. China

<sup>‡</sup>College of Sciences, Hebei North University, Photovoltaic Conductive Film  
Engineering Research Center of Hebei Province, Zhangjiakou, 075000, China

\*Corresponding author's email address: wangcg925@nenu.edu.cn

## Experimental Section

**Materials:** Polyacrylic acid (PAA) and sulfur were obtained from Sigma-Aldrich (USA). Isopropyl alcohol (IPA), anhydrous ethanol, Coalt (II) chloride hexahydrate, melamine was purchased from Sinopharm Chemical Reagent Beijing Co., Ltd. Deionized water was used in all experiments.

**Fabrication of  $\text{Co}(\text{OH})_2/\text{PAA-NH}_4$  NSs:** A PAA aqueous solution ( $0.2 \text{ g mL}^{-1}$ , 4 mL) and  $\text{NH}_3 \cdot \text{H}_2\text{O}$  ( $2 \text{ mol L}^{-1}$ , 4 mL) were added in deionized water (0.4 L) with a 2 L round-bottom flask and dispersed for 30 min ultrasonically. Then, 1.6 L isopropyl alcohol (IPA) was dripped to the round-bottom flask under magnetic stirring to form PAA- $\text{NH}_4$  NSs suspension. Subsequently, 1.2 g  $\text{CoCl}_2 \cdot 6\text{H}_2\text{O}$  was added into the PAA- $\text{NH}_4$  NSs suspension under magnetic stirring for more than 4 h to obtain the  $\text{Co}(\text{OH})_2/\text{PAA-NH}_4$  NSs. The obtained  $\text{Co}(\text{OH})_2/\text{PAA-NH}_4$  NSs were centrifuged and washed several times by deionized water and IPA and finally dried at  $50^\circ\text{C}$  for 24 h for further experiment.

**Preparation of Co/CNS/CNT, CNS/CNT and CNS:** The  $\text{Co}(\text{OH})_2/\text{PAA-NH}_4@\text{PDA}$  NSs and melamine were mixed with a mass ratio of 1:20 and loaded in the combustion boat with lid. The combustion boat was heated at  $600^\circ\text{C}$  for 1 h under a high-purity argon atmosphere, and then further treated at  $900^\circ\text{C}$  for another 3 h. After cooling down, the Co/CNS/CNT were collected for further experiment. The CNS/CNT were obtained by washing Co/CNS/CNT with concentrated hydrochloric acid. Mixture of polyacrylic acid

(PAA) and ammonia were loaded in the combustion boat with lid and heated at 600 °C for 1 h under a high-purity argon atmosphere to obtain CNS.

**Synthesis of Co/CNS/CNT-S, CNS/CNT-S and CNS-S:** Sulfur was incorporated into Co/CNS/CNT, CNS/CNT and CNS by a melt-diffusion strategy. In a typical procedure, 70 mg of sulfur and 30 mg of Co/CNS/CNT (or CNS/CNT) were mixed and ground in an agate mortar for 30 min. Then, the mixture was sealed in a vacuum glass container and heated at 155 °C for 12 h. After cooling down to room temperature naturally, the product was immersed in 25 mL ethanol solution at room temperature for 15 min to eliminate the possible sulfur particles that attached on the surface of Co/CNS/CNT-S or CNS/CNT-S. The CNS-S was obtained in the same way as above.

**Visualized adsorption experiments of Li<sub>2</sub>S<sub>6</sub>:** The Li<sub>2</sub>S<sub>6</sub> solution is prepared by mixing Li<sub>2</sub>S and sulfur at the molar ratio of 1:5 in a mixed solution of DOL and DME (1:1, volume ratio) followed by magnetic stirring for 20 h at 80 °C. Then, 20 mg Co/CNS/CNT, CNS/CNT or CNS power are added into as prepared Li<sub>2</sub>S<sub>6</sub> (5 mL, 2 mmol L<sup>-1</sup>) solution, respectively.

**Characterization:** Transmission electron micrographs were taken by JEOL JEM-2100F transmission electron microscope (TEM) under 200 kV accelerating voltage. Scanning electron microscopy (SEM) images were obtained by using an XL30 ESEM-FEG field emission scanning electron microscope (FEI Co.). The X-ray photoelectron spectrum (XPS)

was performed with an ECSALAB 250 by using non-monochromated Al K $\alpha$  radiation. N<sub>2</sub> adsorption-desorption measurements were measured using an intelligent gravimetric analyzer Autosorb-iQ (Quantachrome). The X-ray diffraction (XRD) patterns were obtained on a D8 Focus diffractometer with Cu K $\alpha$  radiation. The thermogravimetric analysis (TGA) was carried out on a Perkin-Elmer TG-7 analyzer heated from room temperature to 800 °C at a ramp rate of 10 °C min<sup>-1</sup> in air.

**Electrochemical measurements:** Electrochemical performance of these samples was conducted by using the 2025-type coin cell. The sulfur composite cathodes were consisted of the active materials, acetylene black and binder (polyvinylidene fluoride, PVDF) in N-methyl-pyrrolidinone (NMP) solvent with a weight ratio of 80:10:10. The mixture was stirred for 12 h, then spread on a carbon-coated aluminum foil and dried in a vacuum oven at 50 °C to remove the solvent. The obtained film was punched into 14 mm disks. The areal mass loading of sulfur was about 1.0 mg cm<sup>-2</sup>, and 20  $\mu$ L of electrolyte was used in the coin cells. To construct electrodes with high sulfur loading, we prepared with a sulfur areal loading of 4.0 mg cm<sup>-2</sup> on thicker films to construct electrodes with high sulfur loading, and 80  $\mu$ L electrolyte was used in the coin cells. The coin cells were assembled in an argon-filled glovebox with the above-prepared sulfur composite cathodes, separator film, liquid electrolyte and lithium metal foil anodes. A solution of 1.0 mol L<sup>-1</sup> bis-(trifluoro-methane)-sulfonamide lithium (LiTFSI) and 1wt% LiNO<sub>3</sub> dissolved in a mixed solvent of 1,2-dimethoxyethane (DME) and 1,3-dioxolane (DOL) with a 1:1 volume ratio was used as the

liquid electrolyte. The cycling performances of Li-S cells were measured on a Neware Battery Measurement System (Neware, China) at different current densities with a potential window of 1.7-2.8 V vs Li/Li<sup>+</sup>. The CV curves were collected on a CHI760E electrochemical workstation at a scan rate of 0.1 mV s<sup>-1</sup> between 1.7 and 2.8 V. Electrochemical impedance spectroscopy (EIS) analysis was carried out in the range from 100 kHz to 0.01 Hz. For the symmetric electrochemical cell measurement, 90 wt% active material (Co/CNS/CNT, CNS/CNT or CNS) and 10 wt% PVDF binder were homogenized in NMP to form a consistent slurry, which was then uniformly coated on aluminum current collector. Each coin cell added 30  $\mu$ L electrolyte (0.5 mol L<sup>-1</sup> Li<sub>2</sub>S<sub>6</sub> in DME electrolyte). Cyclic voltammetry (CV) curves were measured at a scan rate of 50 mV s<sup>-1</sup> in a potential window of -1.0 to 1.0 V. All specific capacity values were obtained based on the mass of elemental sulfur. For the nucleation of lithium sulfide, the applied Li<sub>2</sub>S<sub>8</sub> electrolyte was prepared by mixing sulfur and Li<sub>2</sub>S with a molar ratio of 7:1 in tetraglyme with extra 1.0 mol L<sup>-1</sup> LiTFSI under 80 °C with continuous magnetic stirring for 24 h. The concentration of Li<sub>2</sub>S<sub>8</sub> was 2.0 mol[S] L<sup>-1</sup>. 20  $\mu$ L of the Li<sub>2</sub>S<sub>8</sub> electrolyte was dropped onto the Co/CNS/CNT, CNS/CNT or CNS cathode, while 20  $\mu$ L blank electrolyte without Li<sub>2</sub>S<sub>8</sub> was added to the anode side. The assembled cells were first galvanostatically discharged at 0.112 mA to 2.06 V and then potentiostatically discharged at 2.05 V for nucleation of Li<sub>2</sub>S. The potentiostatic discharge was terminated when the current was below 10<sup>-5</sup> A.

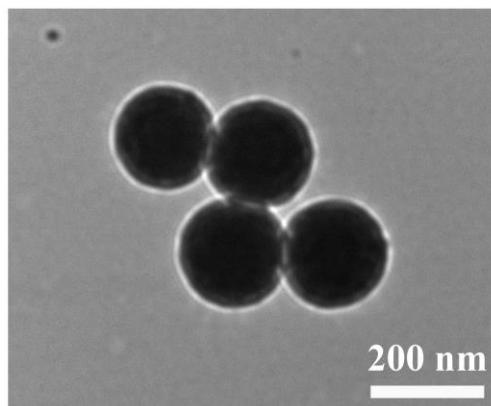

**Figure S1.** TEM images of PAA-NH<sub>4</sub> NSs.

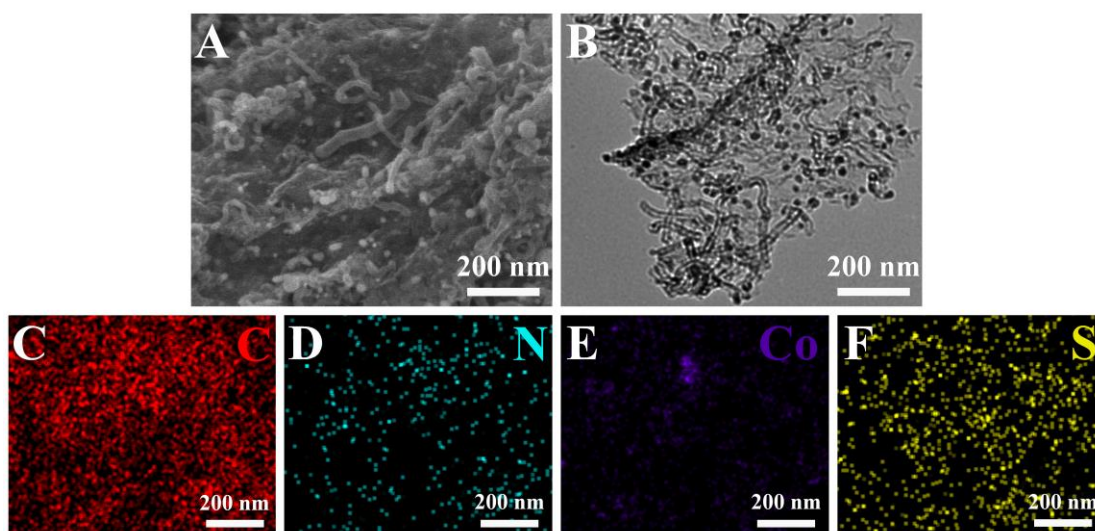

**Figure S2.** SEM and TEM images of (A and B) Co/CNS/CNT-S. Elemental mapping images of (C) C, (D) N, (E) Co, (F) S of Co/CNS/CNT-S.

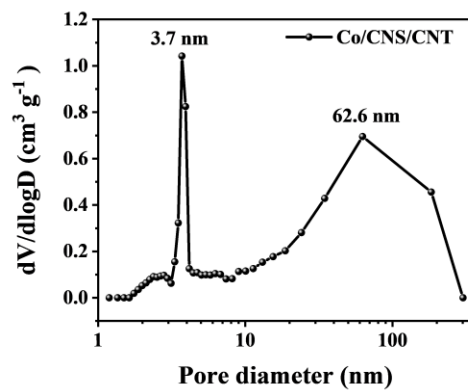

**Figure S3.** The pore size distribution of the Co/CNS/CNT.

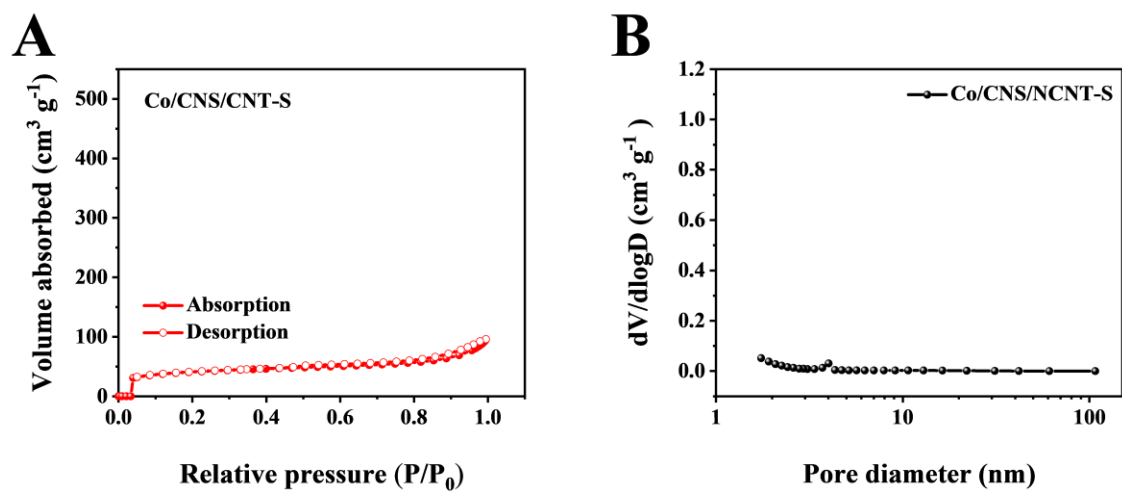

**Figure S4.** (A) Nitrogen adsorption-desorption isotherms of Co/CNS/CNT-S and (B) the pore size distribution of Co/CNS/CNT-S.

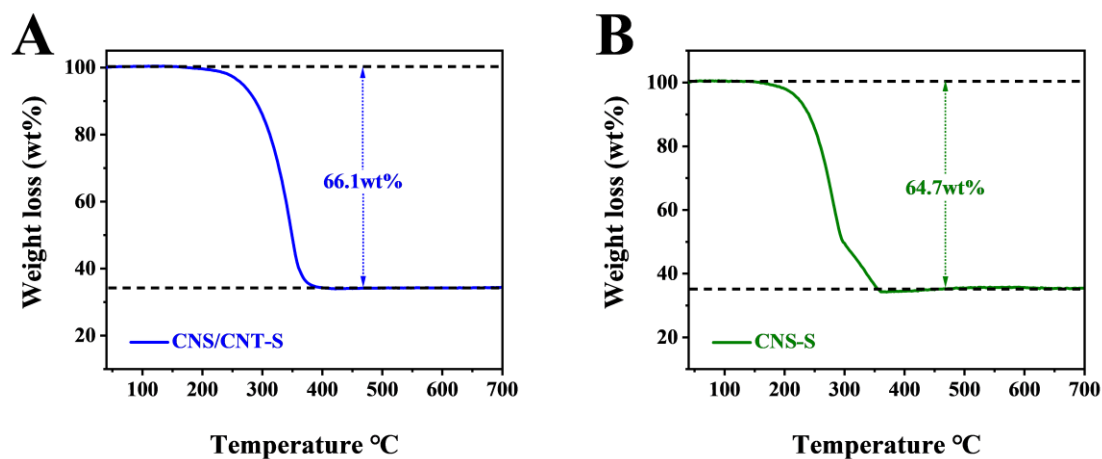

**Figure S5.** TGA curve of (A) CNS/CNT-S and (B) CNS-S under  $N_2$  atmosphere from room temperature to 700 °C.

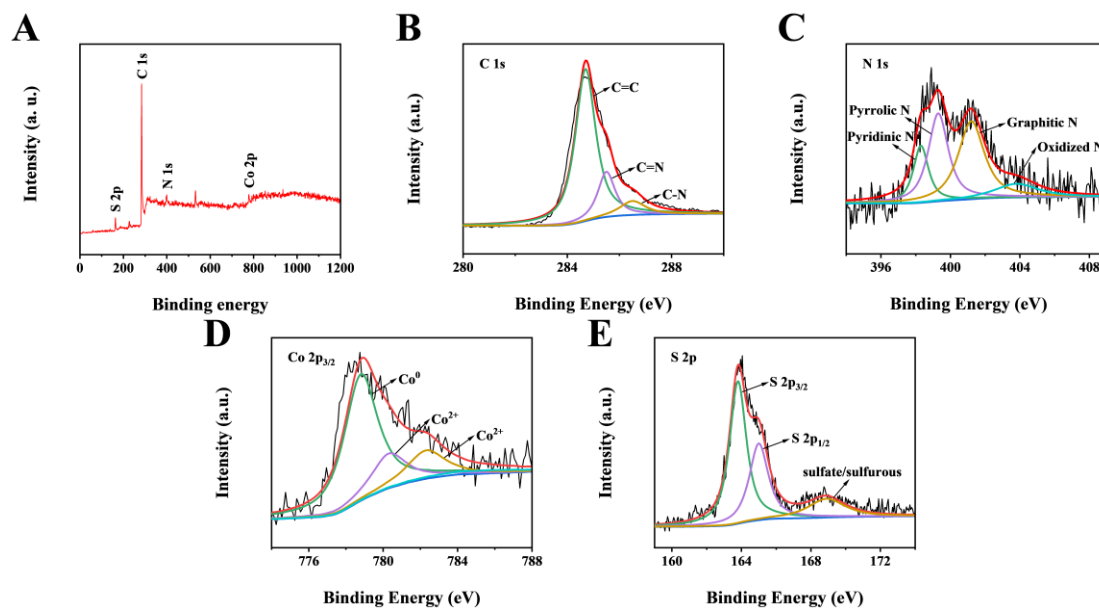

**Figure S6.** (A) XPS spectrum of Co/CNS/CNT-S. High-resolution XPS spectra at (B) C 1s spectrum; (C) N 1s spectrum; (D) Co  $2p_{3/2}$  spectrum and (E) S 2p spectrum.



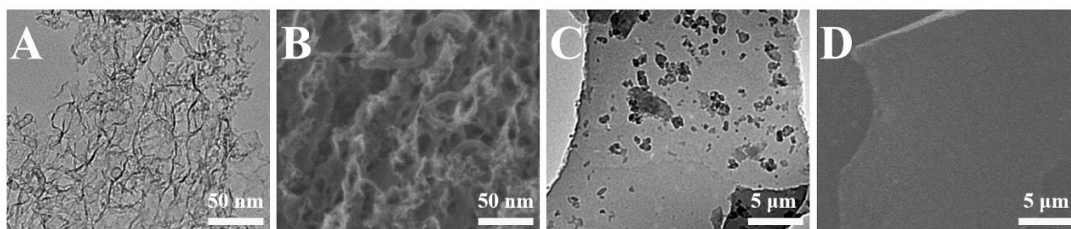

**Figure S7.** TEM images of (A) CNS/CNT and (C) CNS; SEM images of (B) CNS/CNT and (D) CNS.

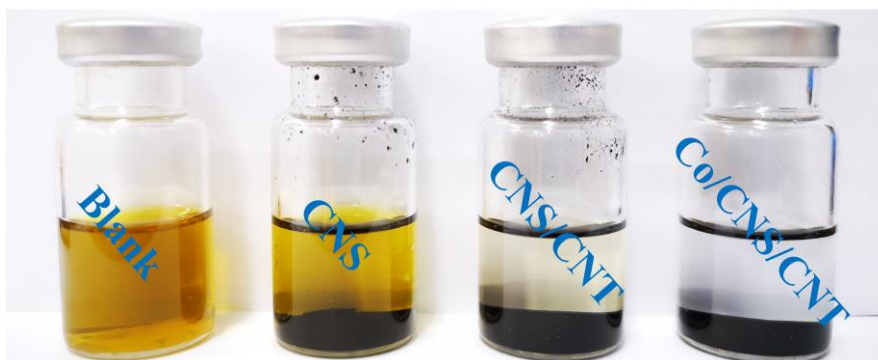

**Figure S8.** Co/CNS/CNT, CNS/CNT, CNS adsorption capacity test in mixed 5mL DME/DOL solutions of 2 mM  $\text{Li}_2\text{S}_6$  solution.

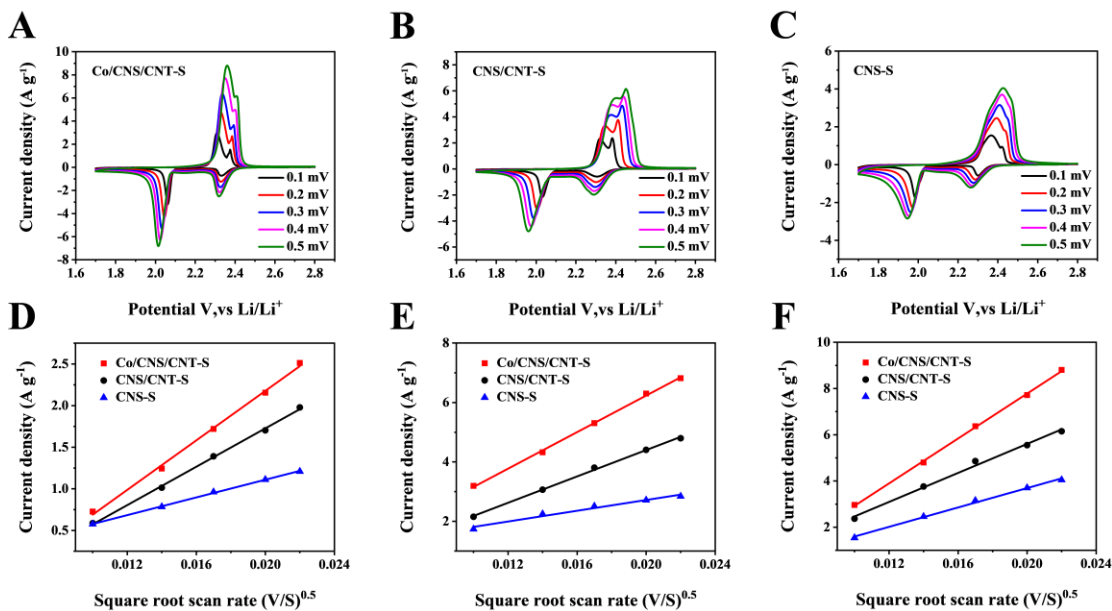

**Figure S9.** (A-C) CV curves of the Co/CNS/CNT-S, CNS/CNT-S and CNS-S cathodes at various scan rates (0.1-0.5 mV s<sup>-1</sup>). (D-F) The corresponding relationship between peak current density (Peak 1, Peak 2 and Peak 3) and square root scan rate of the Co/CNS/CNT-S, CNS/CNT-S and CNS-S cathodes. The linear relationship suggests a diffusion-controlled electrochemical process and the slope is directly related with Li-ion diffusion coefficient.

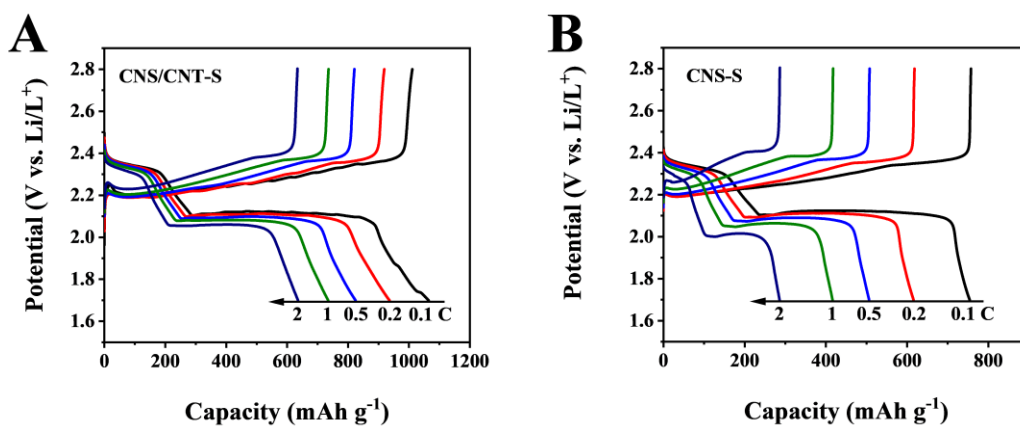

**Figure S10.** Galvanostatic discharge-charge profiles of the (A) CNS/CNT-S and (B) CNS-S cathode at different rates from 0.1 to 2.0 C.

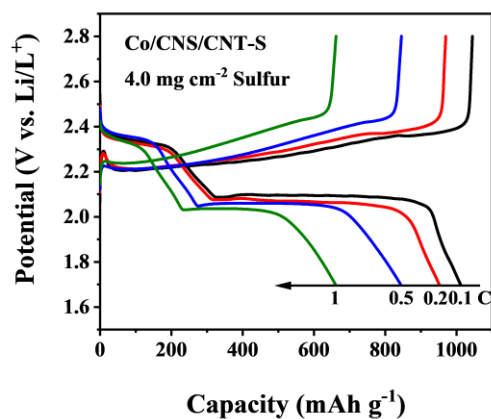

**Figure S11.** Galvanostatic discharge-charge profiles of the Co/CNS/CNT-S cathode with a sulfur loading of  $4.0 \text{ mg cm}^{-2}$  at different current rates from 0.1 to 1.0 C.

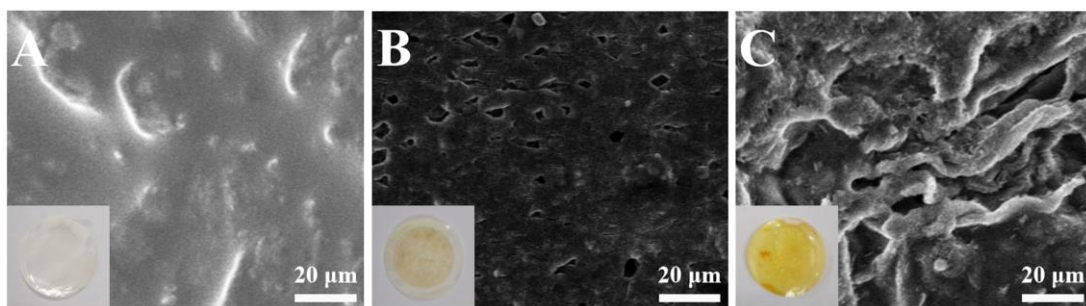

**Figure S12.** SEM images and separator photos from the disassembled Li-S cell after 200 cycles at 1 C with different cathodes: (A) Co/CNS/CNT-S, (B) CNS/CNT-S, (C) CNS-S.

Table S1. Performance comparison of the Co/CNS/CNT-S with other containing element Co composite host materials.

| Material        | Cycling number | Capacity at last cycle<br>(mAh g <sup>-1</sup> ) | Rate | Ref.     |
|-----------------|----------------|--------------------------------------------------|------|----------|
| Co/CNS/CNT-S    | 500            | 660.4                                            | 1 C  | Our work |
| Co/N-PCNF@S     | 200            | 728                                              | 1 C  | [1]      |
| Co@NCNT-S       | 500            | 428                                              | 1 C  | [2]      |
| S@Co/N-PCNSs    | 200            | 633                                              | 1 C  | [3]      |
| S/N-CNTs/Co-NFs | 500            | 623                                              | 1 C  | [4]      |
| S@Co-NCNT/NP    | 500            | 670                                              | 1 C  | [5]      |
| Co@NC/S         | 200            | 619                                              | 1 C  | [6]      |
| Co@CNT/nG-70S   | 700            | 601                                              | 2 C  | [7]      |

## References

- (1) Zhang, J.; Wang, W.; Zhang, Y.; Bakenov, Z.; Zhao, Y. Hierarchical Rambutan-Like CNTs-Assembled N-Co-C@rGO Composite as Sulfur Immobilizer for High-Performance Lithium-Sulfur Batteries. *ChemElectroChem* **2019**, *6*, 4565-4570.
- (2) Liu, S.; Li, J.; Yan, X.; Su, Q.; Lu, Y.; Qiu, J.; Wang, Z.; Lin, X.; Huang, J.; Liu, R.; Zheng, B.; Chen, L.; Fu, R.; Wu, D. Superhierarchical Cobalt-Embedded Nitrogen-Doped Porous Carbon Nanosheets as Two-in-One Hosts for High-Performance Lithium-Sulfur Batteries. *Adv. Mater.* **2018**, *30*, 1706895.
- (3) Zhang, Q.; Qiao, Z.; Cao, X.; Qu, B.; Yuan, J.; Fan, T. E.; Zheng, H.; Cui, J.; Wu, S.; Xie, Q.; Peng, D. L. Rational integration of spatial confinement and polysulfide conversion catalysts for high sulfur loading lithium-sulfur batteries. *Nanoscale Horiz.* **2020**, *5*, 720-729.
- (4) Shao, A. H.; Zhang, Z.; Xiong, D. G.; Yu, J.; Cai, J. X.; Yang, Z. Y. Facile Synthesis of a “Two-in-One” Sulfur Host Featuring Metallic-Cobalt-Embedded N-Doped Carbon Nanotubes for Efficient Lithium-Sulfur Batteries. *ACS Appl. Mater. Interfaces* **2020**, *12*, 5968-5978.
- (5) Ma, L.; Lin, H.; Zhang, W.; Zhao, P.; Zhu, G.; Hu, Y.; Chen, R.; Tie, Z.; Liu, J.; Jin, Z. Nitrogen-Doped Carbon Nanotube Forests Planted on Cobalt Nanoflowers as Polysulfide Mediator for Ultralow Self-Discharge and High Areal-Capacity Lithium-Sulfur Batteries. *Nano Lett.* **2018**, *18*, 7949-7954.
- (6) Chen, T.; Cheng, B.; Zhu, G.; Chen, R.; Hu, Y.; Ma, L.; Lv, H.; Wang, Y.; Liang, J.; Tie, Z.; Jin, Z.; Liu, J. Highly Efficient Retention of Polysulfides in “Sea Urchin”-Like Carbon Nanotube/Nanopolyhedra Superstructures as Cathode Material for Ultralong-Life Lithium-Sulfur Batteries. *Nano Lett.* **2017**, *17*, 437-444.
- (7) Faheem, M.; Li, W.; Ahmad, N.; Yang, L.; Tufail, M. K.; Zhou, Y.; Zhou, L.; Chen, R.; Yang, W. Chickpea derived Co nanocrystal encapsulated in 3D nitrogen-doped mesoporous carbon: Pressure cooking synthetic strategy and its application in lithium-

sulfur batteries. *J. Colloid Interface Sci.* **2021**, 585, 328-336.
